# Supplementary material
Source: PubMed Central journal article supplement (PMC7185407)
Supplement: mmc1.pdf [file mmc1.pdf]

**Cell Host & Microbe, Volume 22**

**Supplemental Information**

**Intrahost Selection Pressures Drive**

**Rapid Dengue Virus Microevolution**

**in Acute Human Infections**

**Poornima Parameswaran, Chunling Wang, Surbhi Bharat Trivedi, Meghana Eswarappa, Magelda Montoya, Angel Balmaseda, and Eva Harris**

## **Title**

Intrahost selection pressures drive rapid dengue virus microevolution in acute human infections

## **Authors**

Poornima Parameswaran<sup>1,3</sup>, Chunling Wang<sup>1,3</sup>, Surbhi Bharat Trivedi<sup>1</sup>, Meghana Eswarappa<sup>1</sup>, Magelda Montoya<sup>1</sup>, Angel Balmaseda<sup>2</sup> and Eva Harris<sup>1,4,\*</sup>

## **Author affiliations**

<sup>1</sup>Division of Infectious Diseases and Vaccinology, School of Public Health, University of California, Berkeley, Berkeley, CA, 94720-3370 USA

<sup>2</sup>Laboratorio Nacional de Virología, Centro Nacional de Diagnóstico y Referencia, Ministry of Health, Managua, 16064 Nicaragua

<sup>3</sup>These authors contributed equally

<sup>4</sup>Lead Contact

\*Corresponding author: Dr. Eva Harris, Division of Infectious Diseases and Vaccinology, School of Public Health, University of California, Berkeley, 185 Li Ka Shing Center, 1951 Oxford Street, Berkeley, CA, 94720-3370, USA; Tel. 510-642-4845; FAX 510-642-6350; Email: eharris@berkeley.edu

## **Running Title**

Intrahost virus microevolution in human dengue

Figure S1

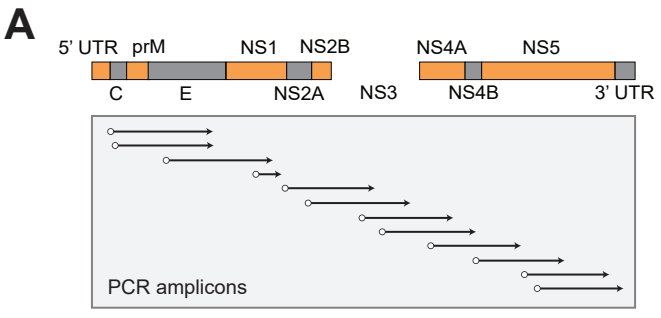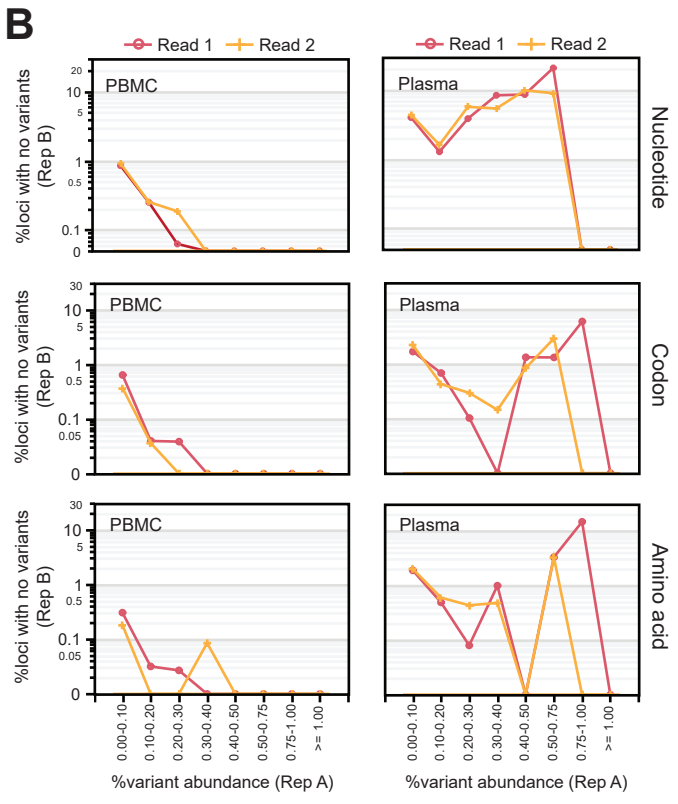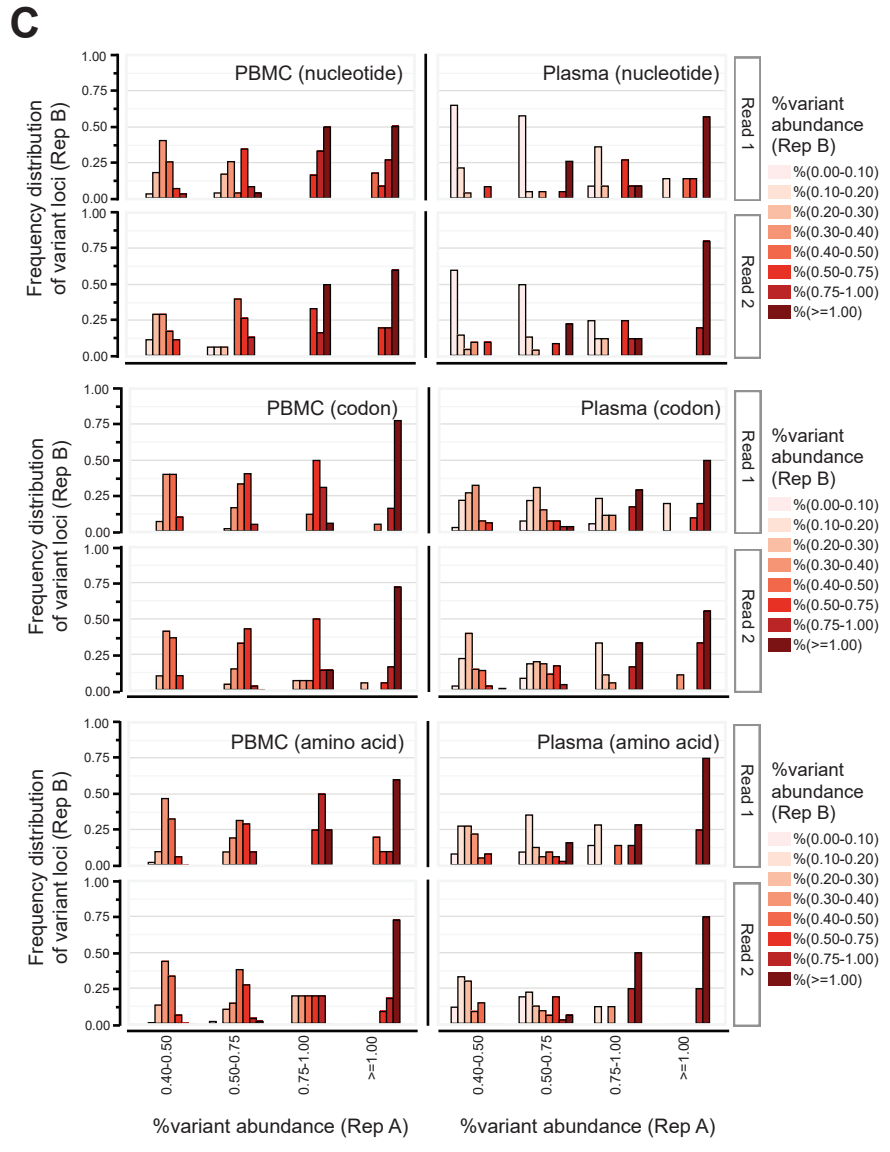

Figure S2

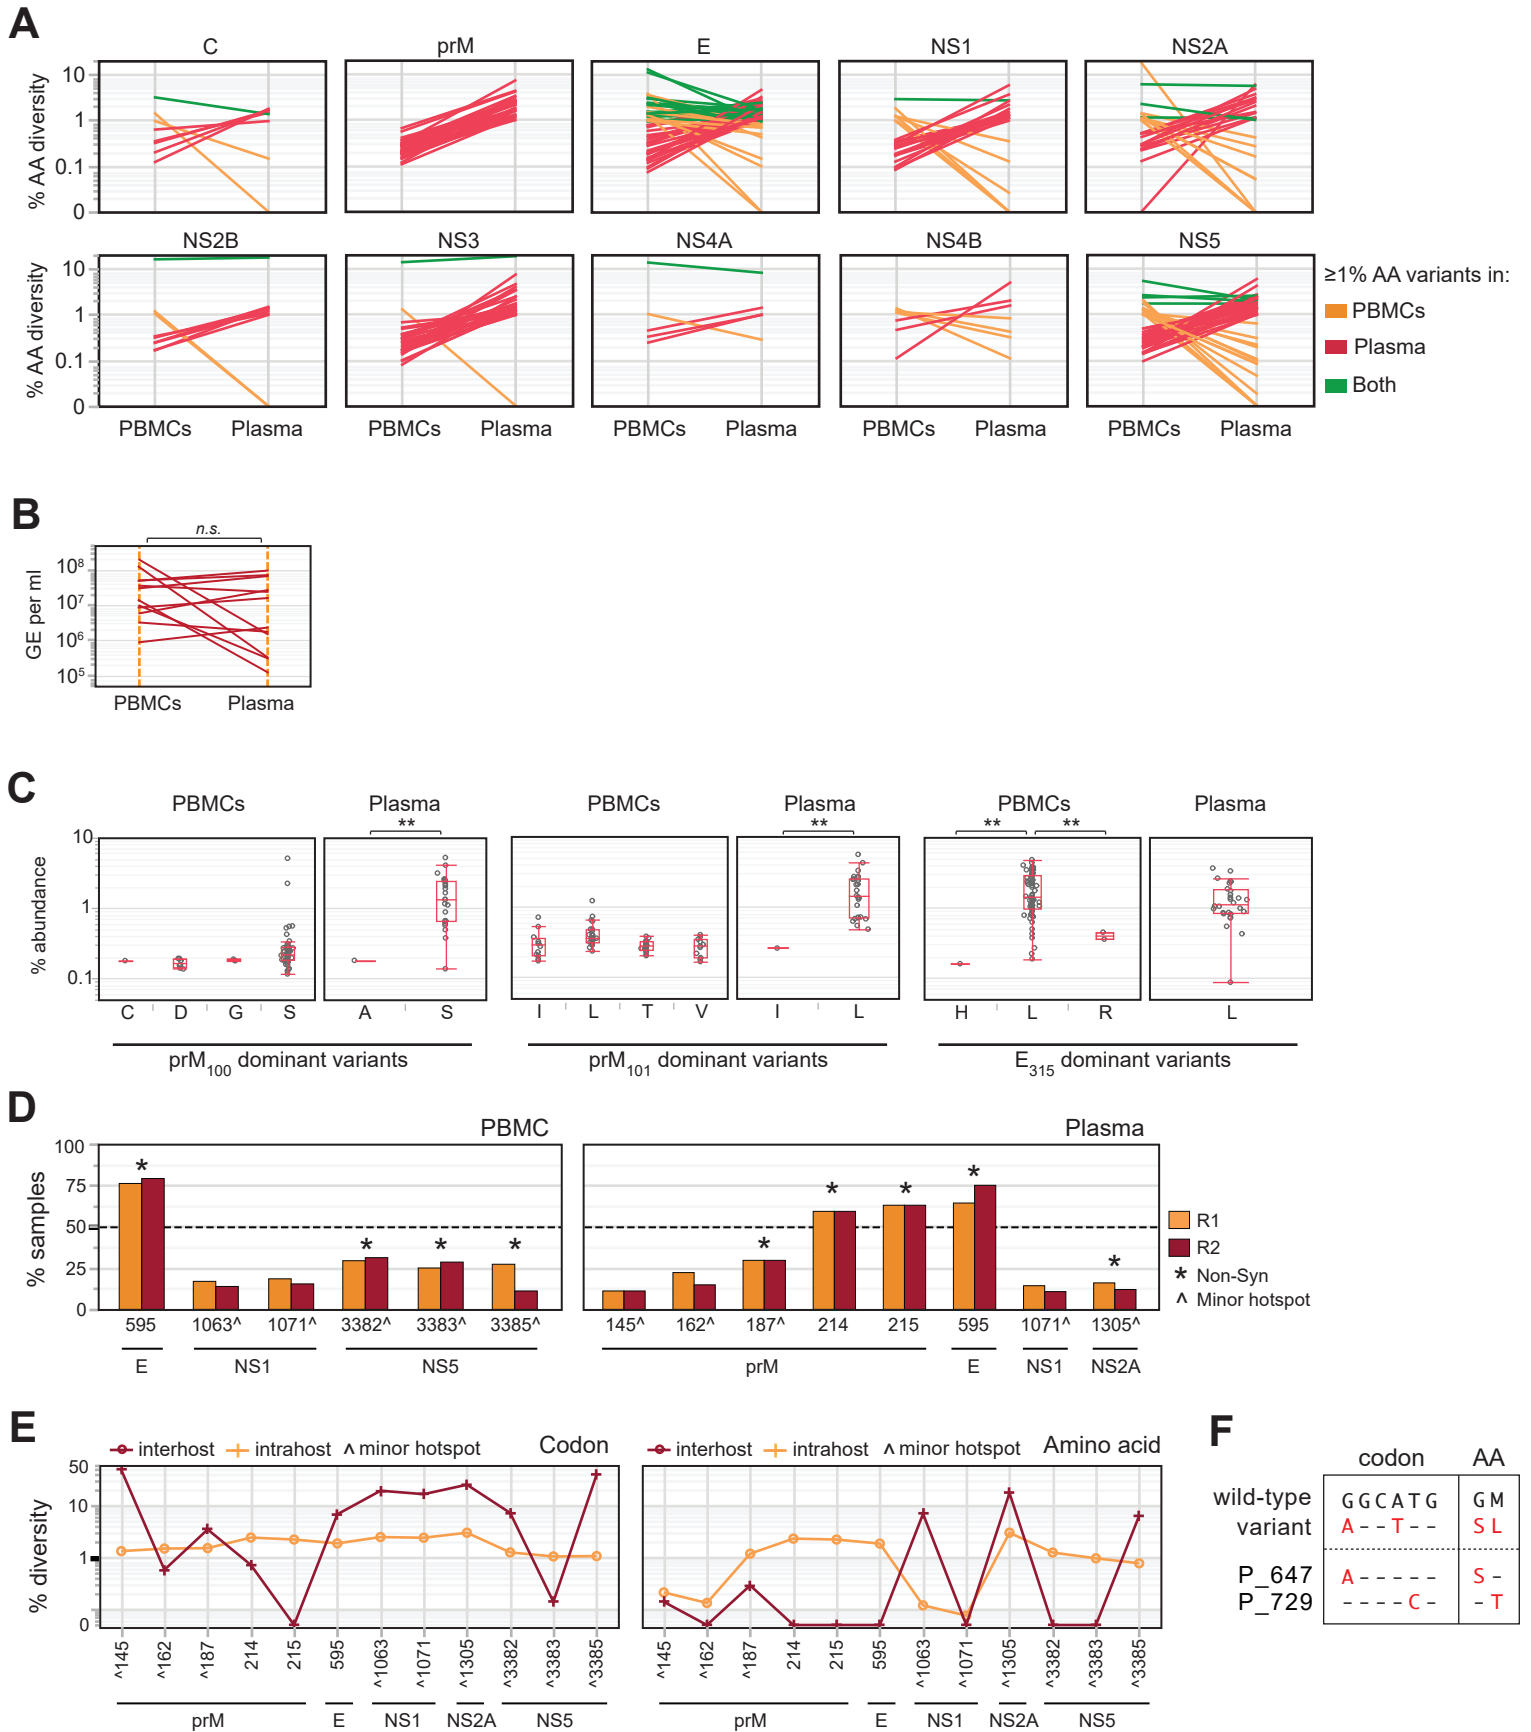

Figure S3

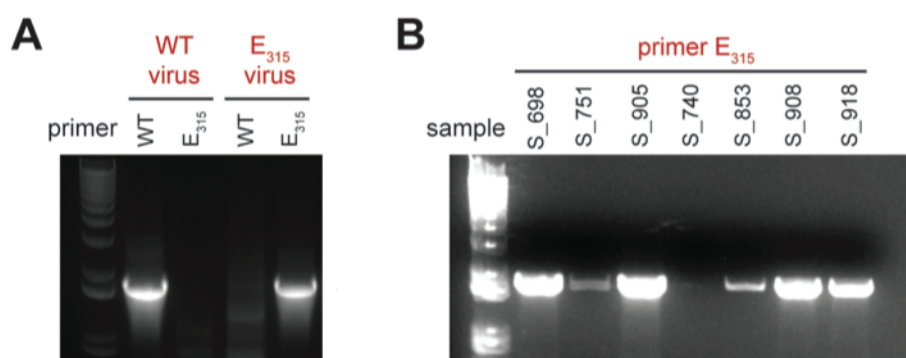

Figure S4

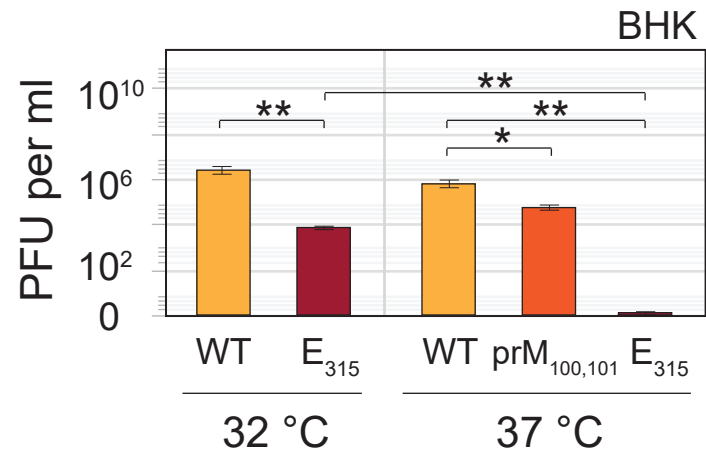

Figure S5

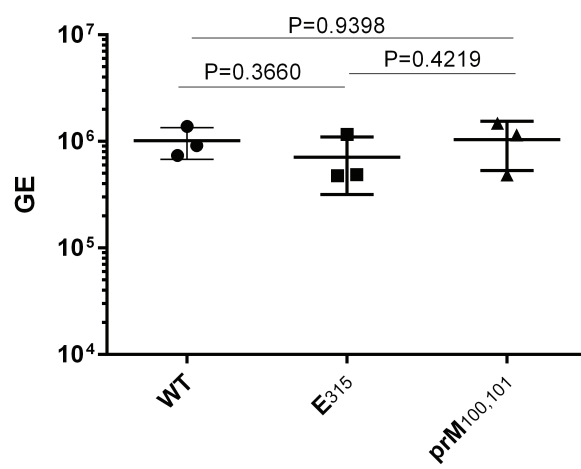

## Supplemental Figure Legends

**Figure S1. Defining thresholds for intrahost DENV-3 diversity, related to STAR Methods. (A)** Sequence-directed capture of intrahost diversity in the DENV-3 coding region using twelve overlapping PCR amplicons. **(B)** For each subset of loci associated with discrete categories of percent variant diversity in replicate A (x-axis), the percent loci in replicate B exhibiting no variants is shown (y-axis). Data is pooled from replicate datasets for four PBMC (*left panels*) and three plasma (*right panels*) samples. Variant diversity is binned by read orientation (read 1 – red and read 2 - yellow), and by type of locus - nucleotide (*top panel*), codon (*middle panel*) or amino acid (*bottom panel*). The threshold for variant detection was chosen based on the minimum percent variant diversity in replicate A at which variants were also detected in replicate B (i.e., the % loci with no variants in replicate B equaled zero), for both reads 1 and 2. **(C)** Frequency distributions of loci in replicate B (y-axis) categorized by percent variant diversity (shades of red), for different cutoffs of percent variant diversity in replicate A (x-axis). Variant diversity is shown for replicate data from four PBMC (*left panels*) and three plasma (*right panels*) samples, and is binned by read orientation (read 1 or read 2) and type of locus - nucleotide (*top panel*), codon (*middle panel*) or amino acid (*bottom panel*).

**Figure S2. Diversity profiles in PBMC and plasma samples at the gene and codon levels, related to Figure 1-3. (A)** Gene-specific comparisons of percent amino acid variants in paired PBMC and plasma samples, colored by whether individual loci display  $\geq 1\%$  AA diversity in PBMC samples only (yellow), in plasma samples only (red), or in both PBMC and plasma samples (green). **(B)** Comparisons of genome equivalents per milliliter (GE per ml) of extracted RNA in paired PBMC and plasma samples. 'n.s.' non-significant (Wilcoxon signed-rank test for paired samples). **(C)** Percent abundance of dominant non-synonymous variants observed in PBMC and plasma samples at the prM<sub>100</sub>, prM<sub>101</sub> and E<sub>315</sub> hotspot loci, median  $\pm$  SD, boxes represent 25<sup>th</sup> and 75<sup>th</sup> percentiles, and whiskers are 10<sup>th</sup> and 90<sup>th</sup> percentiles. \*\* $P < 0.0001$  (Wilcoxon test for unpaired samples). **(D)** All hotspot loci (i.e., loci with  $\geq 1\%$  variant abundance in  $\geq 10\%$  of samples) in PBMC (*left panel*) and plasma (*right panel*) samples in



both read orientations (read 1 in yellow, and read 2 in red). Locus numbering reflects codon position in the DENV-3 polyprotein such that the dominant hotspots prM<sub>100</sub>, prM<sub>101</sub> and E<sub>315</sub> are assigned codon numbers 214, 215 and 595, respectively. Hotspots associated with non-synonymous variants (i.e., mutations that change amino acid sequence) are highlighted with asterisks (\*). The dotted line indicates the threshold for identifying the prominent hotspots (i.e., presence of hotspot in ≥50% of samples) in prM and E. Minor hotspot variants are indicated with '^'. **(E)** Average percent intrahost (red) and percent interhost (yellow) diversity in codon (*left panel*) or amino acid (*right panel*) coordinates for each hotspot locus. Interhost diversity was calculated across all global DENV-3 isolates for which full-genome sequences were available ( $n = 690$ ). Minor hotspot variants are indicated with '^'. **(F)** Intermediate and/or alternate nucleotide and amino acid variants for the prM<sub>100,101</sub> hotspot loci.

**Figure S3. Detection of E<sub>315</sub> variant virus using Reverse Transcription and PCR (RT-PCR), related to Figure 2. (A)** RT-PCR using reverse primers specific for wild-type virus (WT) or E<sub>315</sub> variant virus (E<sub>315</sub>) yielded an amplified product that was 1865 nucleotide (nt) in length, from WT virus RNA template only, or E<sub>315</sub> variant virus RNA template only, respectively. Both WT and E<sub>315</sub> viruses were generated from infectious clones. **(B)** RT-PCR performed using the reverse primer specific for E<sub>315</sub> variant virus (primer E<sub>315</sub>) on RNA templates extracted from a randomly-chosen subset of 7 serum samples, yielded amplified product of 1865 nt from all samples.

**Figure S4. Phenotype of wild-type, prM<sub>100,101</sub> and E<sub>315</sub> variant viruses, related to Figure 4.** Plaque forming units per milliliter (PFU/ml) of C6/36-passaged WT and E<sub>315</sub> viruses at 32°C and 37°C, and prM<sub>100,101</sub> virus at 37°C, in BHK-21 cells. No plaques were detected for the E<sub>315</sub> variant virus at 37°C. Data represent the mean ± SD. \* $P < 0.01$  and \*\* $P < 0.0001$  ( $t$ -test).

**Figure S5. Entry capabilities of wild-type, prM<sub>100,101</sub> and E<sub>315</sub> variant viruses, related to Figure 4.** Entry assays were performed by incubating the WT, E<sub>315</sub> variant, and prM<sub>100,101</sub> variant viruses with U937 cells at 37°C for two hours, followed by extensive washing. Viruses were quantified by qRT-PCR

and the Genome Equivalent (GE) values were plotted on the Y-axis, mean  $\pm$  SD. *P*-values for the various comparisons were computed using a *t*-test.

## Supplemental Tables

**Table S1. Percent coverage across the DENV-3 genome for each patient sample, related to Table 1.**

| Sample type | Patient ID <sup>^</sup> # | Age in Years | Immune status | Disease severity | Sex | Sample collection date | % coverage (read 1)* | Average codon coverage (read 1)* | % coverage (read 2)* | Average codon coverage (read 2)* |
|-------------|---------------------------|--------------|---------------|------------------|-----|------------------------|----------------------|----------------------------------|----------------------|----------------------------------|
| PBMC        | 645                       | 1            | Primary       | DF               | M   | 09/06/2009             | 98.32                | 24357                            | 98.10                | 20514                            |
| PBMC        | 698                       | 7            | Primary       | DF               | M   | 09/17/2009             | 99.71                | 23355                            | 99.69                | 21379                            |
| PBMC        | 708                       | 8            | Primary       | DF               | F   | 09/25/2009             | 94.88                | 12353                            | 94.30                | 10541                            |
| PBMC        | 716                       | 3            | Primary       | DF               | F   | 10/01/2009             | 98.73                | 7972.5                           | 98.28                | 7655                             |
| PBMC        | 718                       | 9            | Primary       | DF               | F   | 10/04/2009             | 99.22                | 27086.5                          | 99.22                | 24837.5                          |
| PBMC        | 729                       | 14           | Primary       | DF               | F   | 10/11/2009             | 99.10                | 19225                            | 99.10                | 17433                            |
| PBMC        | 748                       | 10           | Primary       | DF               | F   | 09/25/2009             | 56.61                | 6716                             | 55.50                | 6308                             |
| PBMC        | 751                       | 10           | Primary       | DF               | M   | 09/30/2009             | 98.33                | 26492                            | 98.26                | 23950                            |
| PBMC        | 760                       | 2            | Primary       | DF               | M   | 10/05/2009             | 99.37                | 20094                            | 99.36                | 18601.5                          |
| PBMC        | 765                       | 5            | Primary       | DF               | M   | 10/13/2009             | 99.72                | 29693.5                          | 99.72                | 26486.5                          |
| PBMC        | 789                       | 1            | Primary       | DF               | M   | 10/13/2009             | 91.38                | 27174                            | 90.88                | 25142.5                          |
| PBMC        | 828                       | 5            | Primary       | DF               | F   | 10/21/2009             | 90.18                | 8497                             | 88.94                | 7891.5                           |
| PBMC        | 831                       | 4            | Primary       | DF               | F   | 10/20/2009             | 70.62                | 9696                             | 66.54                | 7539                             |
| PBMC        | 832                       | 3            | Primary       | DF               | M   | 10/20/2009             | 98.13                | 29959                            | 98.00                | 22980                            |
| PBMC        | 839                       | 3            | Primary       | DF               | F   | 10/23/2009             | 99.77                | 27094                            | 99.66                | 22461.5                          |
| PBMC        | 844                       | 2            | Primary       | DF               | M   | 10/25/2009             | 99.49                | 23128                            | 99.30                | 18748                            |
| PBMC        | 849                       | 12           | Primary       | DF               | M   | 10/26/2009             | 99.52                | 23127                            | 99.47                | 19292                            |
| PBMC        | 905                       | 6            | Primary       | DF               | M   | 11/18/2009             | 99.70                | 20021                            | 99.49                | 15207                            |
| PBMC        | 921                       | 3            | Primary       | DF               | F   | 11/28/2009             | 88.41                | 9714.5                           | 87.74                | 8234                             |
| PBMC        | 922                       | 7            | Primary       | DF               | F   | 12/07/2009             | 88.73                | 8719                             | 87.30                | 7408                             |
| PBMC        | 924                       | 2            | Primary       | DF               | M   | 12/07/2009             | 99.26                | 21616                            | 98.99                | 17800.5                          |
| PBMC        | 927                       | 6            | Primary       | DF               | M   | 11/19/2009             | 99.71                | 18250                            | 99.62                | 14752                            |
| PBMC        | 934                       | 10           | Primary       | DF               | M   | 11/28/2009             | 99.11                | 16879                            | 98.93                | 14792.5                          |
| PBMC        | 938                       | 9            | Primary       | DF               | M   | 11/29/2009             | 99.72                | 32155.5                          | 99.69                | 27281                            |
| PBMC        | 939                       | 10           | Primary       | DF               | F   | 12/07/2009             | 99.49                | 41328.5                          | 99.43                | 35533.5                          |
| PBMC        | 944                       | 8            | Primary       | DF               | M   | 12/11/2009             | 99.88                | 22253                            | 99.86                | 19311                            |
| PBMC        | 947                       | 4            | Primary       | DF               | F   | 12/12/2009             | 99.88                | 34318.5                          | 99.88                | 30020                            |
| PBMC        | 950                       | 4            | Primary       | DF               | M   | 12/12/2009             | 98.68                | 32089                            | 98.65                | 27836                            |
| PBMC        | 950R                      | 4            | Primary       | DF               | M   | 12/12/2009             | 98.57                | 28363                            | 98.53                | 25061                            |
| PBMC        | 955                       | 3            | Primary       | DF               | M   | 12/19/2009             | 99.24                | 31680                            | 99.24                | 27881.5                          |
| PBMC        | 955R                      | 3            | Primary       | DF               | M   | 12/19/2009             | 98.44                | 23452                            | 98.40                | 21361                            |
| PBMC        | 956                       | 1            | Primary       | DF               | F   | 12/20/2009             | 99.89                | 34099                            | 99.89                | 31041                            |
| PBMC        | 957                       | 3            | Primary       | DF               | F   | 12/18/2009             | 99.88                | 46762                            | 99.88                | 42269.5                          |
| PBMC        | 957R                      | 3            | Primary       | DF               | F   | 12/18/2009             | 98.82                | 79693.5                          | 98.81                | 69010.5                          |
| PBMC        | 1005                      | 9            | Primary       | DF               | M   | 01/17/2010             | 99.87                | 57352                            | 99.86                | 50548                            |
| PBMC        | 1005R                     | 9            | Primary       | DF               | M   | 01/17/2010             | 98.67                | 30928                            | 98.65                | 28224                            |
| PBMC        | 647                       | 6            | Primary       | DHF              | M   | 09/18/2009             | 77.77                | 5968                             | 76.93                | 5009                             |
| PBMC        | 710                       | 6            | Primary       | DHF              | M   | 09/25/2009             | 99.52                | 20294                            | 99.52                | 17935                            |

|        |     |    |           |     |   |            |       |         |       |         |
|--------|-----|----|-----------|-----|---|------------|-------|---------|-------|---------|
| PBMC   | 801 | 2  | Primary   | DHF | F | 10/26/2009 | 98.58 | 32990.5 | 98.56 | 30312.5 |
| PBMC   | 699 | 7  | Primary   | DSS | M | 09/18/2009 | 97.54 | 15235   | 97.50 | 13659.5 |
| PBMC   | 949 | 9  | Primary   | DSS | M | 12/12/2009 | 99.64 | 22635   | 99.62 | 20165   |
| PBMC   | 631 | 6  | Secondary | DF  | M | 09/07/2009 | 66.10 | 6100    | 62.62 | 5751    |
| PBMC   | 632 | 6  | Secondary | DF  | M | 09/07/2009 | 98.05 | 18262   | 97.95 | 16261   |
| PBMC   | 646 | 5  | Secondary | DF  | F | 09/19/2009 | 95.93 | 5822    | 94.40 | 4982.5  |
| PBMC   | 652 | 8  | Secondary | DF  | F | 09/29/2009 | 96.80 | 8873    | 96.59 | 7706.5  |
| PBMC   | 655 | 11 | Secondary | DF  | M | 10/04/2009 | 65.73 | 6552    | 61.93 | 6103    |
| PBMC   | 656 | 9  | Secondary | DF  | F | 10/05/2009 | 99.03 | 18862   | 99.01 | 16160   |
| PBMC   | 694 | 10 | Secondary | DF  | M | 09/23/2009 | 98.53 | 23765   | 98.51 | 20980   |
| PBMC   | 697 | 6  | Secondary | DF  | M | 09/20/2009 | 99.69 | 15933   | 99.67 | 14163.5 |
| PBMC   | 714 | 8  | Secondary | DF  | F | 09/29/2009 | 98.24 | 26650   | 98.17 | 23905   |
| PBMC   | 715 | 10 | Secondary | DF  | F | 09/28/2009 | 96.94 | 20799   | 96.88 | 19146   |
| PBMC   | 722 | 12 | Secondary | DF  | F | 10/09/2009 | 75.16 | 3192    | 71.88 | 3037    |
| PBMC   | 726 | 6  | Secondary | DF  | M | 10/10/2009 | 98.94 | 18862   | 98.96 | 16855   |
| PBMC   | 737 | 12 | Secondary | DF  | M | 10/12/2009 | 98.98 | 25059   | 98.83 | 21842   |
| PBMC   | 740 | 4  | Secondary | DF  | F | 10/12/2009 | 99.44 | 14024   | 99.09 | 12111.5 |
| PBMC   | 792 | 6  | Secondary | DF  | F | 10/19/2009 | 57.97 | 6185    | 57.35 | 5689    |
| PBMC   | 793 | 7  | Secondary | DF  | M | 10/19/2009 | 99.22 | 20080   | 99.14 | 18858.5 |
| PBMC   | 825 | 10 | Secondary | DF  | F | 10/19/2009 | 99.63 | 41146   | 99.35 | 36957   |
| PBMC   | 830 | 10 | Secondary | DF  | F | 10/20/2009 | 99.24 | 16291.5 | 96.02 | 12751   |
| PBMC   | 843 | 10 | Secondary | DF  | M | 10/24/2009 | 95.98 | 44036   | 95.95 | 38892   |
| PBMC   | 853 | 12 | Secondary | DF  | F | 10/26/2009 | 99.72 | 22125   | 99.59 | 17492   |
| PBMC   | 918 | 8  | Secondary | DF  | F | 11/16/2009 | 99.12 | 14107   | 98.73 | 11335   |
| PBMC   | 946 | 7  | Secondary | DF  | F | 12/12/2009 | 99.71 | 22971.5 | 99.70 | 19424   |
| PBMC   | 989 | 5  | Secondary | DF  | M | 01/27/2010 | 99.59 | 11506.5 | 99.50 | 10864   |
| PBMC   | 728 | 12 | Secondary | DHF | M | 10/09/2009 | 88.70 | 14226   | 88.67 | 12810   |
| PBMC   | 731 | 5  | Secondary | DHF | F | 10/10/2009 | 86.95 | 36923   | 86.83 | 33841   |
| PBMC   | 833 | 10 | Secondary | DHF | M | 10/22/2009 | 99.57 | 28447.5 | 99.43 | 23109.5 |
| PBMC   | 848 | 8  | Secondary | DHF | M | 10/26/2009 | 99.58 | 22216.5 | 99.36 | 16733.5 |
| PBMC   | 937 | 12 | Secondary | DHF | M | 11/29/2009 | 99.72 | 25700   | 99.71 | 21772   |
| PBMC   | 959 | 4  | Secondary | DHF | F | 01/04/2010 | 98.59 | 26513.5 | 98.54 | 23619   |
| PBMC   | 717 | 12 | Secondary | DSS | F | 10/04/2009 | 99.26 | 37144   | 99.26 | 30921   |
| PBMC   | 847 | 10 | Secondary | DSS | F | 10/24/2009 | 97.57 | 28295   | 97.56 | 23012   |
| Plasma | 698 | 7  | Primary   | DF  | M | 09/17/2009 | 99.32 | 30860   | 99.04 | 24554   |
| Plasma | 718 | 9  | Primary   | DF  | F | 10/04/2009 | 99.65 | 22817.5 | 99.63 | 20161   |
| Plasma | 751 | 10 | Primary   | DF  | M | 09/30/2009 | 97.55 | 8484.5  | 97.45 | 7150    |
| Plasma | 763 | 7  | Primary   | DF  | F | 10/07/2009 | 88.76 | 15506   | 88.76 | 13640   |
| Plasma | 832 | 3  | Primary   | DF  | M | 10/20/2009 | 85.72 | 9447    | 77.49 | 19887   |
| Plasma | 844 | 2  | Primary   | DF  | M | 10/25/2009 | 99.34 | 28214   | 99.32 | 22459.5 |
| Plasma | 849 | 12 | Primary   | DF  | M | 10/26/2009 | 76.70 | 7388.5  | 76.56 | 5946.5  |
| Plasma | 863 | 6  | Primary   | DF  | F | 10/31/2009 | 50.75 | 41668   | 50.72 | 30857   |
| Plasma | 887 | 2  | Primary   | DF  | M | 11/09/2009 | 51.42 | 56349   | 51.35 | 48253   |
| Plasma | 897 | 4  | Primary   | DF  | F | 11/15/2009 | 97.34 | 11099   | 96.92 | 9293    |
| Plasma | 905 | 6  | Primary   | DF  | M | 11/18/2009 | 99.67 | 25622   | 99.67 | 23884   |
| Plasma | 909 | 5  | Primary   | DF  | M | 11/02/2009 | 97.46 | 40600.5 | 97.43 | 36203   |
| Plasma | 927 | 6  | Primary   | DF  | M | 11/19/2009 | 99.77 | 15265   | 99.71 | 13156   |

|        |      |    |           |     |   |            |       |         |       |         |
|--------|------|----|-----------|-----|---|------------|-------|---------|-------|---------|
| Plasma | 938  | 9  | Primary   | DF  | M | 11/29/2009 | 99.92 | 26900.5 | 99.90 | 22439   |
| Plasma | 939  | 10 | Primary   | DF  | F | 12/07/2009 | 99.74 | 21931   | 99.72 | 20123   |
| Plasma | 944  | 8  | Primary   | DF  | M | 12/11/2009 | 99.82 | 36336   | 99.82 | 33207   |
| Plasma | 646  | 5  | Secondary | DF  | F | 09/19/2009 | 99.80 | 9317    | 99.75 | 7654.5  |
| Plasma | 656  | 9  | Secondary | DF  | F | 10/05/2009 | 99.79 | 23477   | 99.72 | 19973   |
| Plasma | 697  | 6  | Secondary | DF  | M | 09/20/2009 | 89.64 | 29521   | 89.35 | 25767   |
| Plasma | 722  | 12 | Secondary | DF  | F | 10/09/2009 | 99.47 | 21656   | 99.44 | 18554.5 |
| Plasma | 722R | 12 | Secondary | DF  | F | 10/09/2009 | 92.62 | 13972   | 91.91 | 12277.5 |
| Plasma | 737  | 12 | Secondary | DF  | M | 10/12/2009 | 88.33 | 14093   | 88.27 | 11744   |
| Plasma | 740  | 4  | Secondary | DF  | F | 10/12/2009 | 95.24 | 10473   | 92.92 | 9816    |
| Plasma | 742  | 9  | Secondary | DF  | F | 10/13/2009 | 98.52 | 19365.5 | 98.43 | 16830   |
| Plasma | 830  | 10 | Secondary | DF  | F | 10/20/2009 | 51.28 | 41408   | 51.33 | 36802   |
| Plasma | 853  | 12 | Secondary | DF  | F | 10/26/2009 | 99.42 | 83233   | 99.35 | 73919   |
| Plasma | 868  | 13 | Secondary | DF  | M | 11/02/2009 | 84.87 | 58334   | 83.43 | 51339   |
| Plasma | 908  | 9  | Secondary | DF  | F | 11/04/2009 | 93.88 | 18502   | 91.27 | 16125   |
| Plasma | 918  | 8  | Secondary | DF  | F | 11/16/2009 | 99.95 | 43136   | 99.96 | 40261   |
| Plasma | 936  | 14 | Secondary | DF  | M | 11/30/2009 | 98.50 | 31324.5 | 98.50 | 27792   |
| Plasma | 936R | 14 | Secondary | DF  | M | 11/30/2009 | 99.71 | 28621.5 | 99.71 | 26402   |
| Plasma | 937  | 12 | Secondary | DHF | M | 11/29/2009 | 99.82 | 22978.5 | 99.81 | 20074   |
| Plasma | 847  | 10 | Secondary | DSS | F | 10/24/2009 | 99.74 | 27811   | 99.71 | 24865.5 |
| Plasma | 847R | 10 | Secondary | DSS | F | 10/24/2009 | 99.90 | 57468   | 99.90 | 51485   |

^The suffix 'R' denotes replicate sample used in defining thresholds for percent intrahost diversity.

#All samples used for this study were from individuals who presented with DENV-3 infection during the 2009-2010 epidemic season in Nicaragua. Over 100 other clinical and laboratory parameters are available for these samples, but not shown due to space constraints.

\*Only nucleotide loci with coverage of  $\geq 1000$  reads and locus-specific Sanger quality scores of  $\geq 30$  were considered for calculating genome coverage. Samples with  $\geq 50\%$  genome coverage are reported.

**Table S2. Interhost diversity at hotspots for intrahost diversity, related to Figure 2.**

| Codon position | Primary <sup>#</sup> codons (intrahost) | Variant* codons (intrahost) | Primary <sup>#</sup> codons (interhost <sup>^</sup> ) | Variant* codons (interhost <sup>^</sup> ) | Primary <sup>#</sup> AA (intrahost) | Variant* AA (intrahost) | Primary <sup>#</sup> AA (interhost <sup>^</sup> ) | Variant* AA (interhost <sup>^</sup> ) |
|----------------|-----------------------------------------|-----------------------------|-------------------------------------------------------|-------------------------------------------|-------------------------------------|-------------------------|---------------------------------------------------|---------------------------------------|
| 145            | ATT, ATC                                | ATC, ATT                    | ATC                                                   | ATT, (ACT)                                | I                                   | V, (T)                  | I                                                 | T                                     |
| 162            | ACG, ACA                                | ACA, ACG                    | ACG                                                   | ACA                                       | T                                   | A                       | T                                                 | -                                     |
| 187            | ACA                                     | GCT, GCA, (ACT)             | ACA                                                   | ACG, (GCA, GCG)                           | T                                   | A                       | T                                                 | A                                     |
| 214            | GGC                                     | AGC                         | GGC                                                   | GGT                                       | G                                   | S                       | G                                                 | -                                     |
| 215            | ATG                                     | TTG                         | ATG                                                   | -                                         | M                                   | L                       | M                                                 | -                                     |
| 595            | CAT                                     | CTT                         | CAT                                                   | CAC                                       | H                                   | L                       | H                                                 | -                                     |
| 1063           | AAT, AAC                                | AAC, AAT                    | AAC                                                   | AAT, AGC, (GAC, GAT)                      | N                                   | S, (K, D, H, I, T)      | N                                                 | S, D                                  |
| 1071           | TTA, TTG                                | TTG, TTA                    | TTG                                                   | CTG, TTA                                  | L                                   | F, S, (*, V, I)         | L                                                 | -                                     |
| 1305           | GTG, ATG                                | GCG, GTG, ATG, GTA          | GTG                                                   | CTG, ATG, (TTG, GTA)                      | V, M                                | A, M, V                 | V                                                 | L, M                                  |
| 3382           | GAG                                     | GGG                         | GAG                                                   | GAA                                       | E                                   | G                       | E                                                 | -                                     |
| 3383           | GAG                                     | GGG                         | GAG                                                   | GAA                                       | E                                   | G                       | E                                                 | -                                     |
| 3385           | TCG                                     | TTG, TCA                    | TCG                                                   | TCA, TTG, (ACA, TTA, CCA)                 | S                                   | L                       | S                                                 | L, T, (P)                             |

<sup>^</sup>For calculating interhost diversity, all available full-length DENV-3 genomes from global isolates ( $n = 690$ ) were used

<sup>#</sup>Codons and amino acids with the highest prevalence are listed as 'primary'

\*Minor codons and amino acids are listed as 'variant' (in decreasing order of prevalence)

**Table S3. Frequencies of various haplotypes linked to variants at the prM<sub>100,101</sub> and E<sub>315</sub> hotspot loci, related to Figure 3.**

| Variant                       | Haplotypes linked to variant | Frequency (predicted) <sup>^</sup> | Frequency (observed) <sup>#</sup> | Number of samples with variant haplotype identical to wild-type consensus haplotype (percent of all samples with variant haplotype) |
|-------------------------------|------------------------------|------------------------------------|-----------------------------------|-------------------------------------------------------------------------------------------------------------------------------------|
| <i>prM</i> <sub>100,101</sub> | C-G-C                        | 0.702                              | 0.688                             | 3 (100%)                                                                                                                            |
| <i>prM</i> <sub>100,101</sub> | T-G-C                        | 0.170                              | 0.195                             | 2 (100%)                                                                                                                            |
| <i>prM</i> <sub>100,101</sub> | C-A-C                        | 0.093                              | 0.104                             | 2 (100%)                                                                                                                            |
| <i>prM</i> <sub>100,101</sub> | C-A-T                        | 0.001                              | 0.013                             | 1 (100%)                                                                                                                            |
| <i>E</i> <sub>315</sub>       | G-G-A                        | 0.533                              | 0.636                             | 24 (100%)                                                                                                                           |
| <i>E</i> <sub>315</sub>       | A-G-A                        | 0.304                              | 0.195                             | 7 (100%)                                                                                                                            |
| <i>E</i> <sub>315</sub>       | A-A-A                        | 0.040                              | 0.117                             | 4 (100%)                                                                                                                            |
| <i>E</i> <sub>315</sub>       | A-G-G                        | 0.017                              | 0.052                             | 4 (100%)                                                                                                                            |

<sup>^</sup>Product of the frequencies of alleles at each of the three loci, calculated from Nicaraguan consensus DENV-3 genomes used in this study.

<sup>#</sup>Frequencies of haplotypes observed in Nicaraguan consensus DENV-3 genomes used in this study.

**Table S4. Sequences of primers used for amplifying the DENV-3 genome, related to STAR****Methods.**

| Sequence               | Description   | Tm    | Amplicon#        | Comments |
|------------------------|---------------|-------|------------------|----------|
| GACTCGGAAGCTTGCTTAAC   | DENV3_32_F    | 62.00 | DENV3-Amplicon1  |          |
| TGATCCAAAGTCCCAAGCTG   | DENV3_2196_R  | 61.18 |                  |          |
| TCAATATGCTGAAACGCGTG   | DENV3_128_F   | 60.81 | DENV3-Amplicon2  |          |
| TGATCCAAAGTCCCAAGCTG   | DENV3_2196_R  | 61.18 |                  |          |
| AAGCTATGCATTGAGGGGAA   | DENV3_1106_F  | 60.04 | DENV3-Amplicon3  |          |
| GTATCGCAAGGGAGGRAGTG   | DENV3_3378_R  | 59.69 |                  |          |
| CATATGGCTGAAACTCCGAG   | DENV3_2907_F  | 58.33 | DENV3-Amplicon4  |          |
| CCAAGCACAAAGACACCCATT  | DENV3_3511_R  | 60.95 |                  |          |
| GGARGTGAAAGGTGGACAA    | DENV3_3466_F  | 59.94 | DENV3-Amplicon5  | R=A or G |
| ATRCTGGCTGGGTCTGTGAA   | DENV3_5393_R  | 58.16 |                  |          |
| TTGACTGTTGCTGGAGAAC    | DENV3_3946_F  | 58.85 | DENV3-Amplicon6  |          |
| CGTCTATGGCGCYGACTT     | DENV3_6073_R  | 59.46 |                  |          |
| AAACGAACGCAGAACCAGAT   | DENV3_5009_F  | 59.74 | DENV3-Amplicon7  |          |
| GCGTACAATGTCCAGGCTGA   | DENV3_6941_R  | 60.47 |                  |          |
| CTCGTGTTGGAATGGGAGAG   | DENV3_5417_F  | 60.17 | DENV3-Amplicon8  |          |
| ACAYAAGGCCCATGATGTTC   | DENV3_7389_R  | 60.79 |                  |          |
| GTCAATCRCCCTTGATCTTG   | DENV3_6366_F  | 60.60 | DENV3-Amplicon9  | R=G or A |
| ATGTTACCTGTRCCATTGGA   | DENV3_8240_R  | 58.85 |                  |          |
| CGGTRGATGGGATAATGACA   | DENV3_7253_F  | 61.53 | DENV3-Amplicon10 | R=G or A |
| CTCCGGGTATCTTGAAAATG   | DENV3_9139_R  | 59.38 |                  |          |
| ATCCAATGGYACAGGTAACA   | DENV3_8220_F  | 58.85 | DENV3-Amplicon11 | Y=T or C |
| GATTGTCCTCGATCCACACC   | DENV3_10024_R | 60.33 |                  |          |
| ATGGATCTTATGAAGTCAAAGC | DENV3_8478_F  | 58.86 | DENV3-Amplicon12 |          |
| ACTGTGGCTTAARTGGCCT    | DENV3_10302_R | 59.62 |                  |          |
